# Supplementary material
Source: publisher figshare collection journal article supplement (https://frontiersin.figshare.com/ndownloader/files/15460487)
Supplement: Supplementary file [file 15460487]

## Supplementary Figure 1

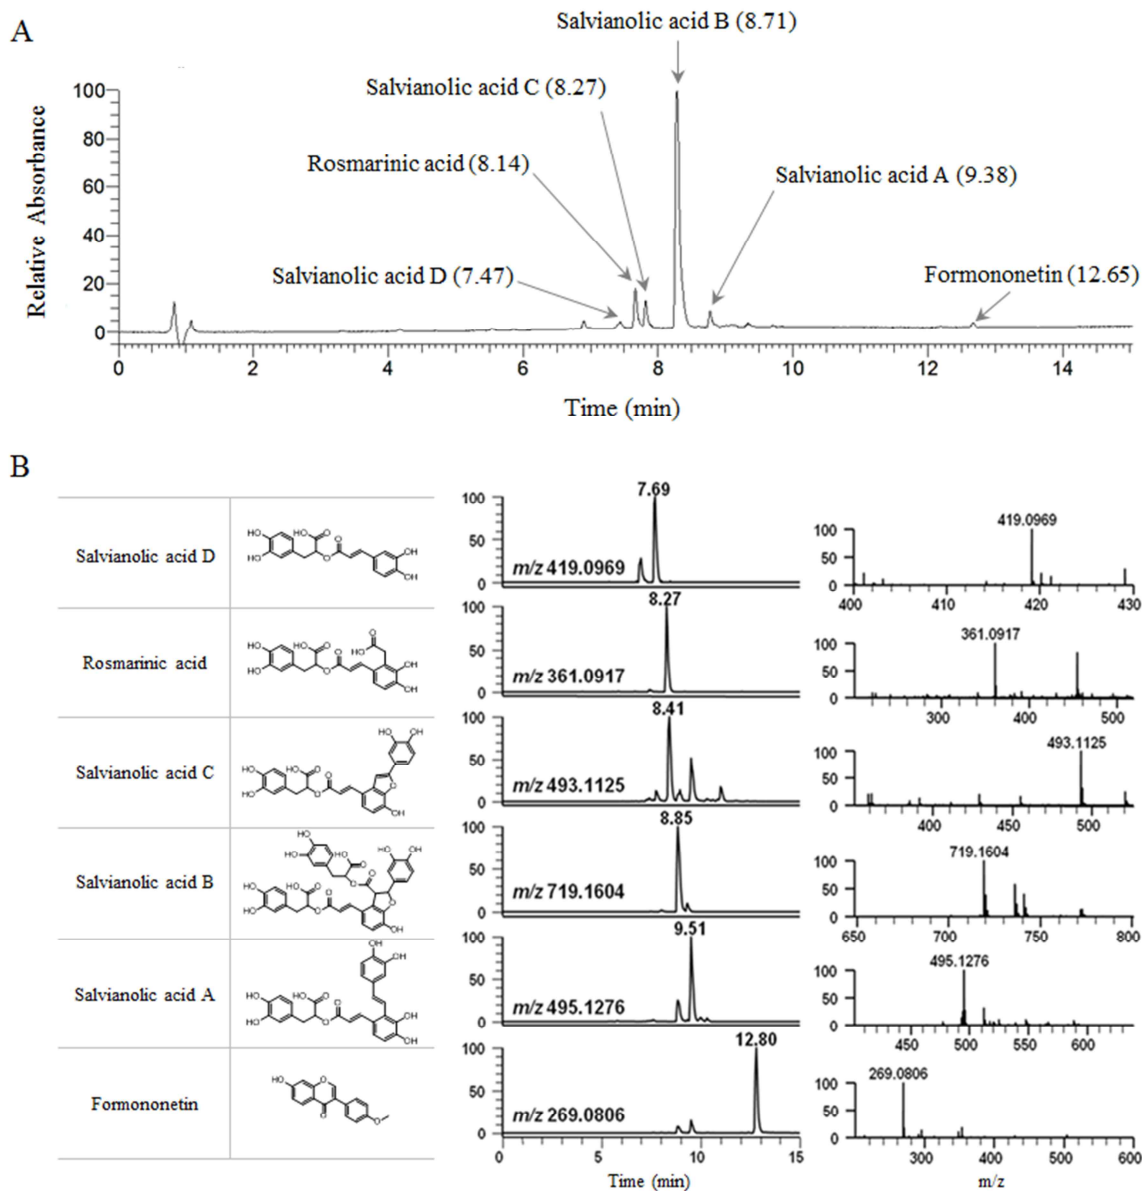

**S. Figure 1. UHPLC and LC/MS chromatogram of Myelophil.** Myelophil and reference compounds were subjected to UHPLC analysis (A). Structures (left), mass chromatogram (middle) and high-resolution mass spectrums (right) of 6 compound of Myelophil [salvianolic acid D ( $m/z$  419.0969,  $[M+H]^+$ ); rosmarinic acid ( $m/z$  361.0917,  $[M+H]^+$ ); salvianolic acid C ( $m/z$  493.1125,  $[M+H]^+$ ); salvianolic acid B ( $m/z$  719.1604,  $[M+H]^+$ ); salvianolic acid A ( $m/z$  495.1276,  $[M+H]^+$ ); formononetin ( $m/z$  269.0906,  $[M+H]^+$ )] (B).

## Supplementary Figure 2

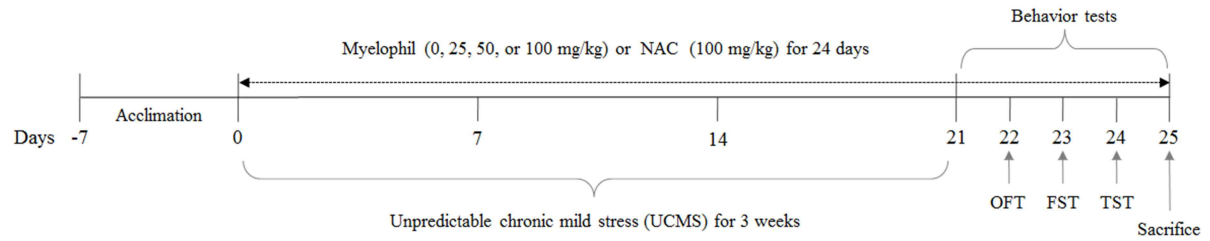

| Day | Stress                              | Duration (condition) |
|-----|-------------------------------------|----------------------|
| 1   | Water deprivation                   | 12 h (dark phase)    |
| 2   | Food deprivation                    | 12 h (dark phase)    |
| 3   | Cold stress at 4°C                  | 1 h (light phase)    |
| 4   | Overnight illumination              | 12 h (dark phase)    |
| 5   | Forced swimming                     | 15 min (light phase) |
| 6   | Restraint                           | 3 h (light phase)    |
| 7   | Water deprivation with empty bottle | 12 h (dark phase)    |
| 8   | 45° cage tilting                    | 12 h (dark phase)    |
| 9   | Isolation stress                    | 24 h                 |
| 10  | Wet bedding                         | 24 h                 |
| 11  | Cold stress at 4°C                  | 1 h (light phase)    |
| 12  | Forced swimming                     | 15 min (light phase) |
| 13  | Overnight illumination              | 12 h (dark phase)    |
| 14  | Wet bedding                         | 24 h                 |
| 15  | Isolation stress                    | 24 h                 |
| 16  | Water and food deprivation          | 12 h (dark phase)    |
| 17  | 45° cage tilting                    | 12 h (dark phase)    |
| 18  | Restraint                           | 3 h (light phase)    |
| 19  | Wet bedding                         | 24 h                 |
| 20  | Overnight illumination              | 12 h (dark phase)    |
| 21  | Water deprivation                   | 12 h (dark phase)    |

**S. Figure 2. Experimental scheme.** Mice were subjected to UCMS procedure for 3 weeks. After the final day of stress, the depression/anxiety-like behaviors were sequentially assessed by OFT on day 22, FST on day 23, and TST on day 24. During the entire experiment period, mice were orally administered with distilled water, Myelophil or NAC, respectively. On day 25<sup>th</sup>, mice were sacrificed under CO<sub>2</sub> anesthesia.
